# Supplementary material for: Employment of Michael addition reactions for the functionalization of carboranes
Source: Royal Society of Chemistry journal article supplement (doi:10.1039/d2nj03509j), 2022-01-01
Supplement: d2nj03509j1.pdf [file d2nj03509j1.pdf]

## Employment of Michael Addition Reaction for Carborane Functionalization

Evgeny G. Rys<sup>a</sup>, Victoria M. Alpatova<sup>a</sup>, Elena G. Kononova<sup>a</sup>, Alexander F. Smol'yakov<sup>a,b</sup>,  
Sergey K. Moiseev<sup>a</sup> and Valentina A. Ol'shevskaya<sup>a\*</sup>

<sup>a</sup>A.N.Nesmeyanov Institute of Organoelement Compounds, Russian Academy of Sciences, 28, bld. 1 Vavilova St., 119334 Moscow, Russian Federation. E-mail: [olshevsk@ineos.ac.ru](mailto:olshevsk@ineos.ac.ru)

<sup>b</sup>Plekhanov Russian University of Economics, Stremyanny per. 36, 117997 Moscow, Russian Federation

### Table of Contents

|     |                                                                                                                                                     |    |
|-----|-----------------------------------------------------------------------------------------------------------------------------------------------------|----|
| 1.  | The <sup>1</sup> H, <sup>11</sup> B and <sup>13</sup> C NMR spectra of 1-benzyl-2-(2-cyanoethyl)- <i>o</i> -carborane ( <b>5</b> )                  | 2  |
| 2.  | The <sup>1</sup> H and <sup>11</sup> B NMR spectra of 1-(4-nitrophenyl)-2-(2-cyanoethyl)- <i>o</i> -carborane ( <b>6</b> )                          | 3  |
| 3.  | The <sup>1</sup> H and <sup>11</sup> B NMR spectra of 1-(4-aminophenyl)-2-(2-cyanoethyl)- <i>o</i> -carborane ( <b>7</b> )                          | 3  |
| 4.  | The <sup>1</sup> H and <sup>11</sup> B NMR spectra of 1,2-bis(2-cyanoethyl)-9-bromo- <i>o</i> -carborane ( <b>12</b> )                              | 4  |
| 5.  | The <sup>1</sup> H and <sup>11</sup> B NMR spectra of 1,2-bis(2-cyanoethyl)-9-iodo- <i>o</i> -carborane ( <b>13</b> )                               | 5  |
| 6.  | The <sup>1</sup> H, <sup>11</sup> B and <sup>13</sup> C NMR spectra of 1,2-bis(2-cyanoethyl)-9- <i>i</i> -propyl- <i>o</i> -carborane ( <b>14</b> ) | 5  |
| 7.  | The <sup>1</sup> H and <sup>11</sup> B NMR spectra of 1,2-bis(2-cyanoethyl)-9-allyl- <i>o</i> -carborane ( <b>15</b> )                              | 6  |
| 8.  | The <sup>1</sup> H and <sup>11</sup> B NMR spectra of ethyl ester <b>16</b>                                                                         | 7  |
| 9.  | The <sup>1</sup> H, <sup>11</sup> B and <sup>13</sup> C NMR spectra of 3-amino-2-(2-cyanoethyl)-1-methyl- <i>o</i> -carborane ( <b>19</b> )         | 8  |
| 10. | The <sup>1</sup> H, <sup>11</sup> B and <sup>13</sup> C NMR spectra of 3-amino-1,2-bis(2-cyanoethyl)- <i>o</i> -carborane ( <b>20</b> )             | 9  |
| 11. | The <sup>1</sup> H and <sup>11</sup> B NMR spectra of compound <b>22</b>                                                                            | 10 |
| 12. | The <sup>1</sup> H and <sup>11</sup> B NMR spectra of 3-(1,4-diethoxy-1,4-dioxobut-2-en-2-yl)amino- <i>o</i> -carborane ( <b>25</b> )               | 10 |
| 13. | The <sup>1</sup> H and <sup>11</sup> B NMR spectra of 1,2-bis(2-cyanoethyl)-9-(2-cyanoethylthio)- <i>o</i> -carborane ( <b>28</b> )                 | 11 |
| 14. | The <sup>1</sup> H, <sup>11</sup> B and <sup>13</sup> C NMR spectra of 9-(2-cyanoethylthio)- <i>o</i> -carborane ( <b>29</b> )                      | 12 |
| 15. | The <sup>1</sup> H and <sup>11</sup> B NMR spectra of acid <b>30</b>                                                                                | 13 |
| 16. | The <sup>1</sup> H and <sup>11</sup> B NMR spectra of 9-(2-cyanoethylthio)- <i>m</i> -carborane ( <b>31</b> )                                       | 13 |
| 17. | The <sup>1</sup> H and <sup>11</sup> B NMR spectra of 3-[( <i>o</i> -carboran-9-yl)thio]methylpropanoate ( <b>32</b> )                              | 14 |
| 18. | The <sup>1</sup> H, <sup>11</sup> B and <sup>13</sup> C NMR spectra of 3-[( <i>m</i> -carboran-9-yl)thio]methylpropionate ( <b>33</b> )             | 15 |

# 1. The $^1\text{H}$ , $^{11}\text{B}$ and $^{13}\text{C}$ NMR spectra of 1-benzyl-2-(2-cyanoethyl)-*o*-carborane (5)

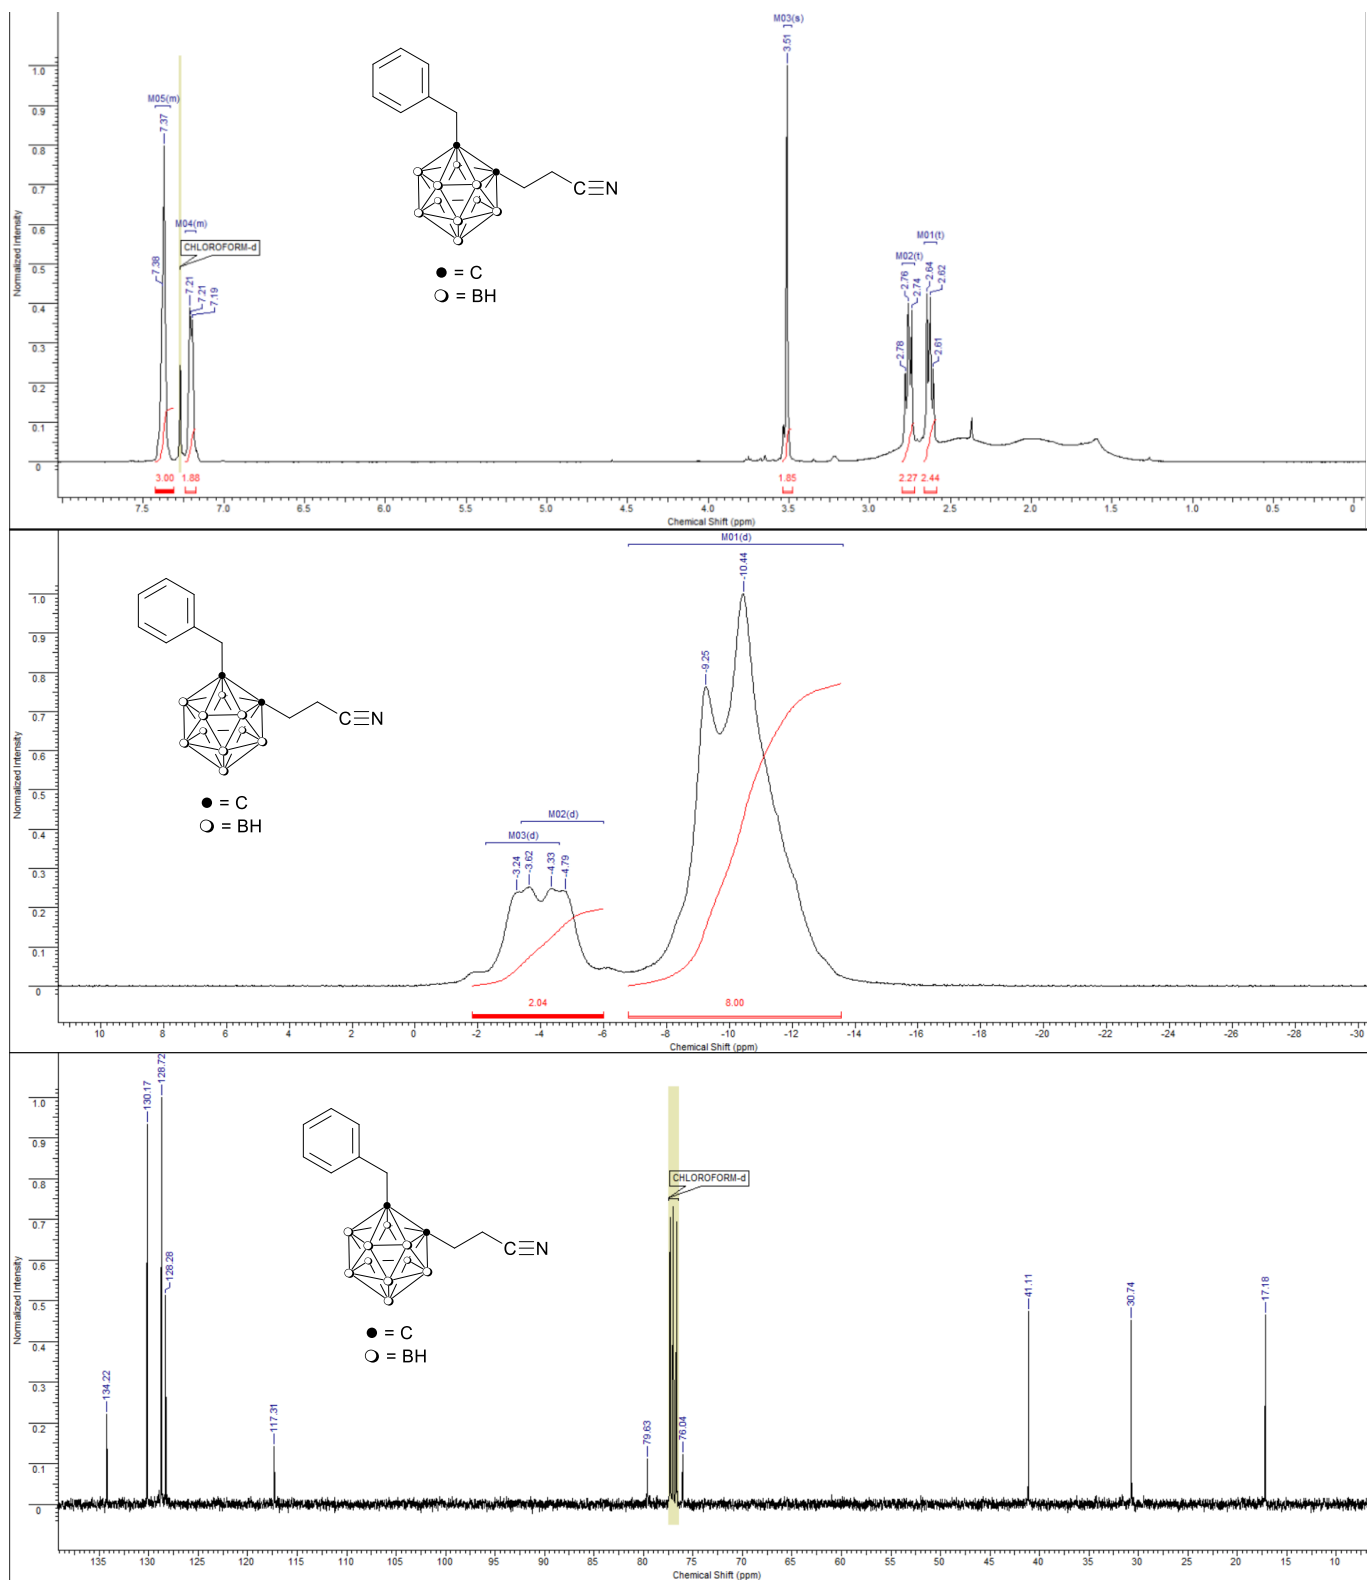

**Figure S1.** The  $^1\text{H}$ ,  $^{11}\text{B}$ ,  $^{13}\text{C}$  NMR spectra of 5 in CDCl<sub>3</sub>.

## 2. The $^1\text{H}$ and $^{11}\text{B}$ NMR spectra of 1-(4-nitrophenyl)-2-(2-cyanoethyl)-*o*-carborane (6)

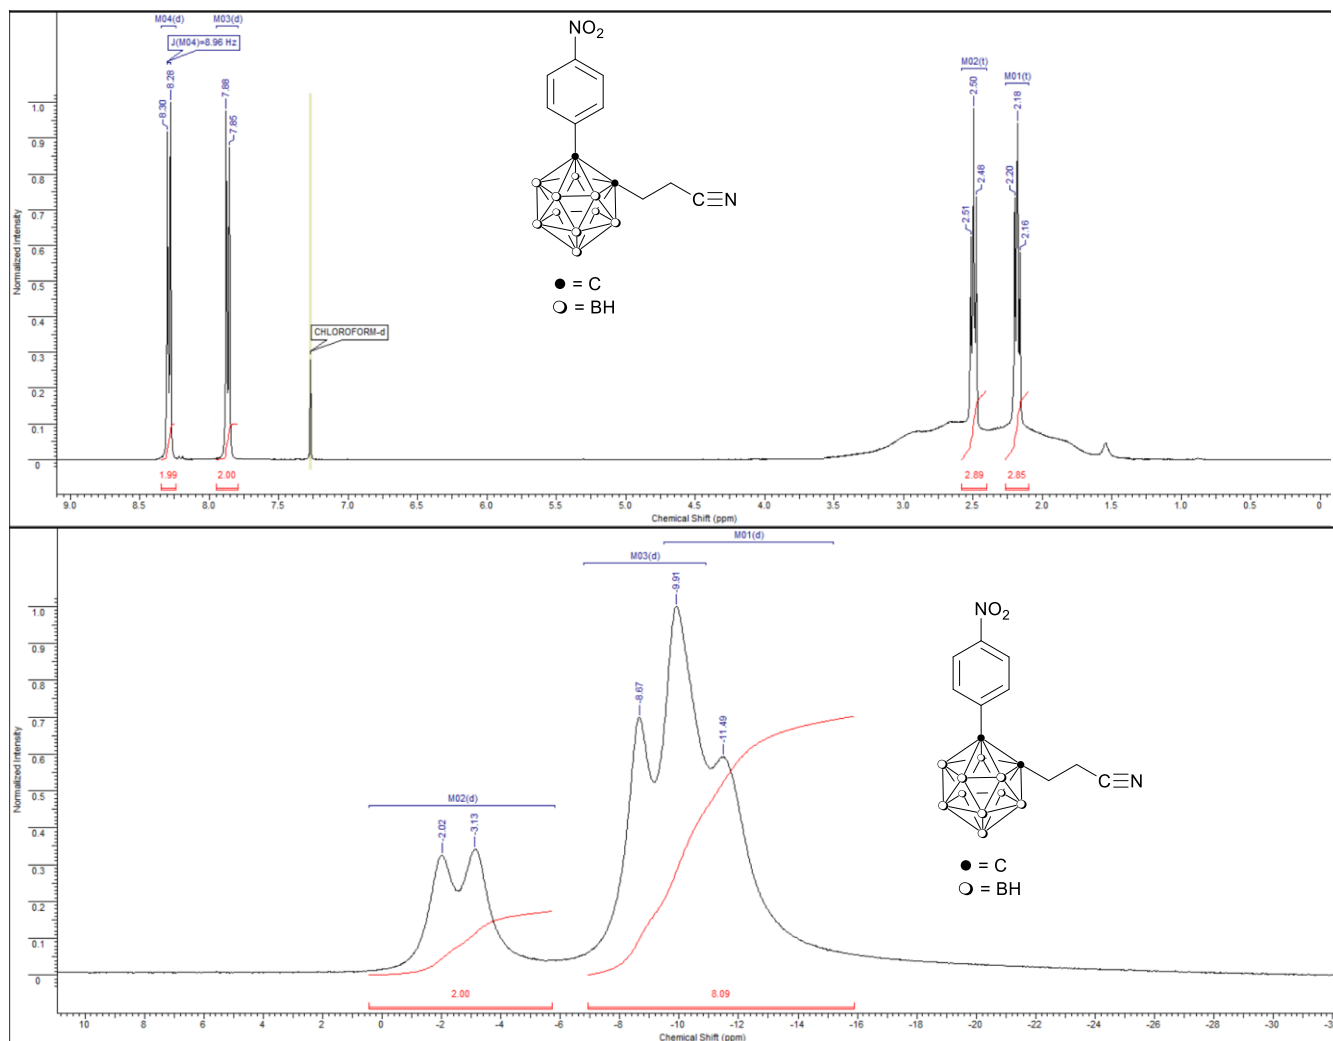

Figure S2. The  $^1\text{H}$ ,  $^{11}\text{B}$  NMR spectra of 6 in  $\text{CDCl}_3$ .

## 3. The $^1\text{H}$ and $^{11}\text{B}$ NMR spectra of 1-(4-aminophenyl)-2-(2-cyanoethyl)-*o*-carborane (7)

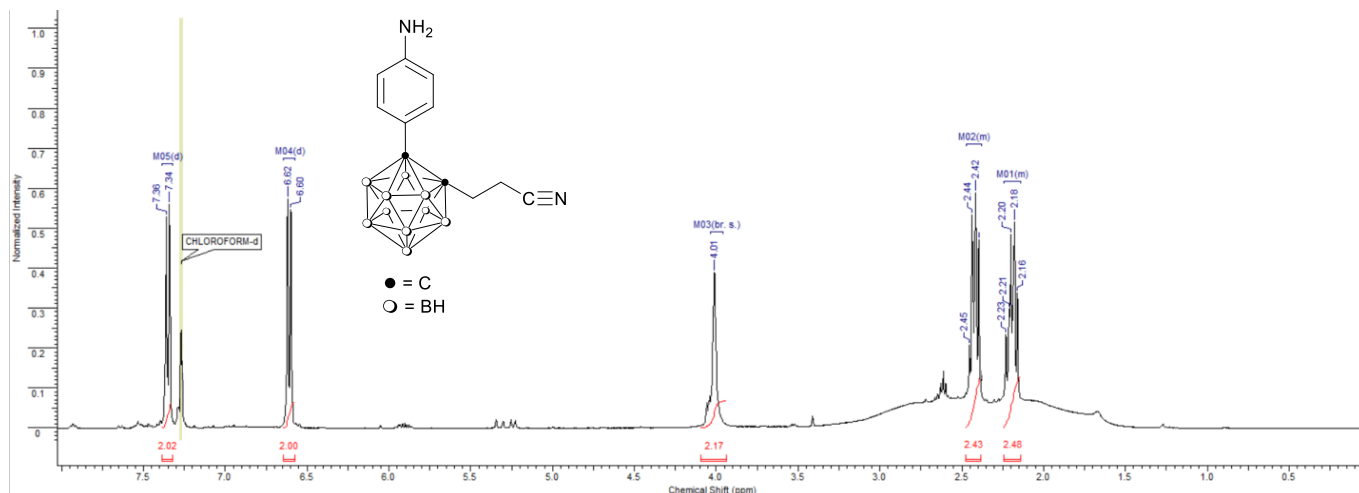

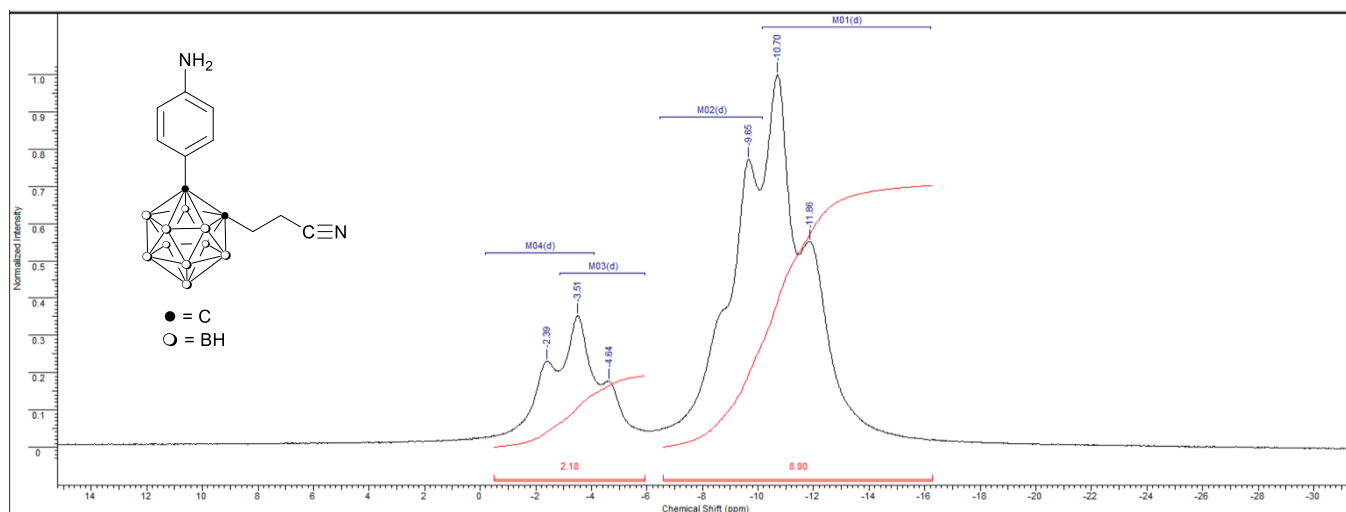

**Figure S3.** The  $^1\text{H}$  and  $^{11}\text{B}$  NMR spectra of **7** in  $\text{CDCl}_3$ .

#### 4. The $^1\text{H}$ and $^{11}\text{B}$ NMR spectra of 1,2-bis(2-cyanoethyl)-9-bromo-*o*-carborane (**12**)

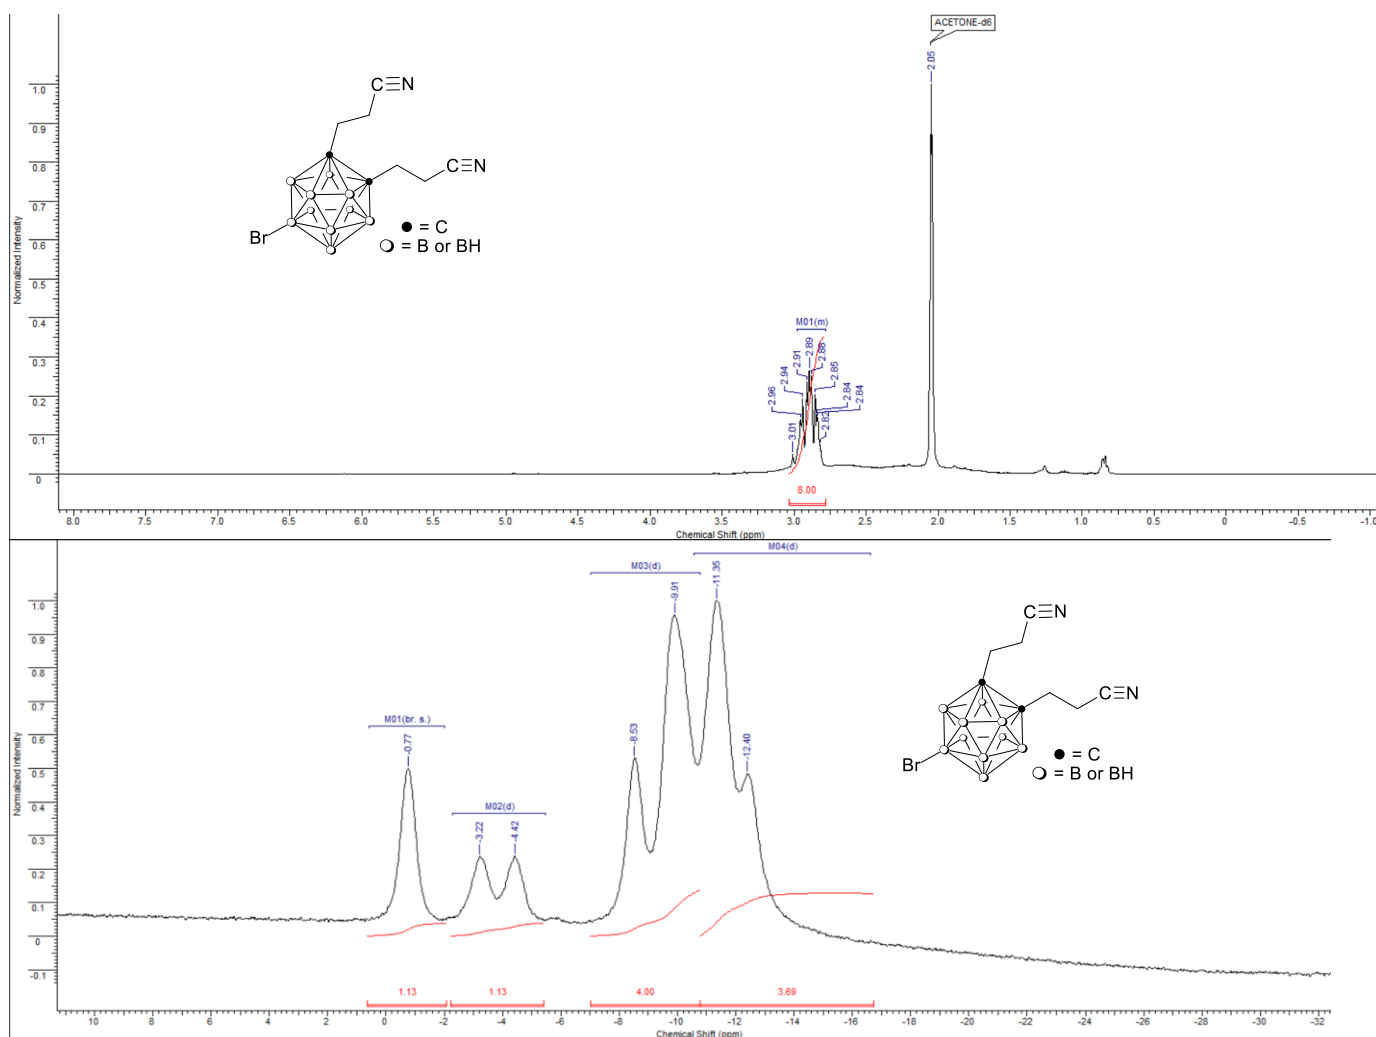

**Figure S4.** The  $^1\text{H}$ ,  $^{11}\text{B}$  NMR spectra of **12** in  $(\text{CD}_3)_2\text{CO}$ .

### 5. The $^1\text{H}$ and $^{11}\text{B}$ NMR spectra of 1,2-bis(2-cyanoethyl)-9-iodo-*o*-carborane (13)

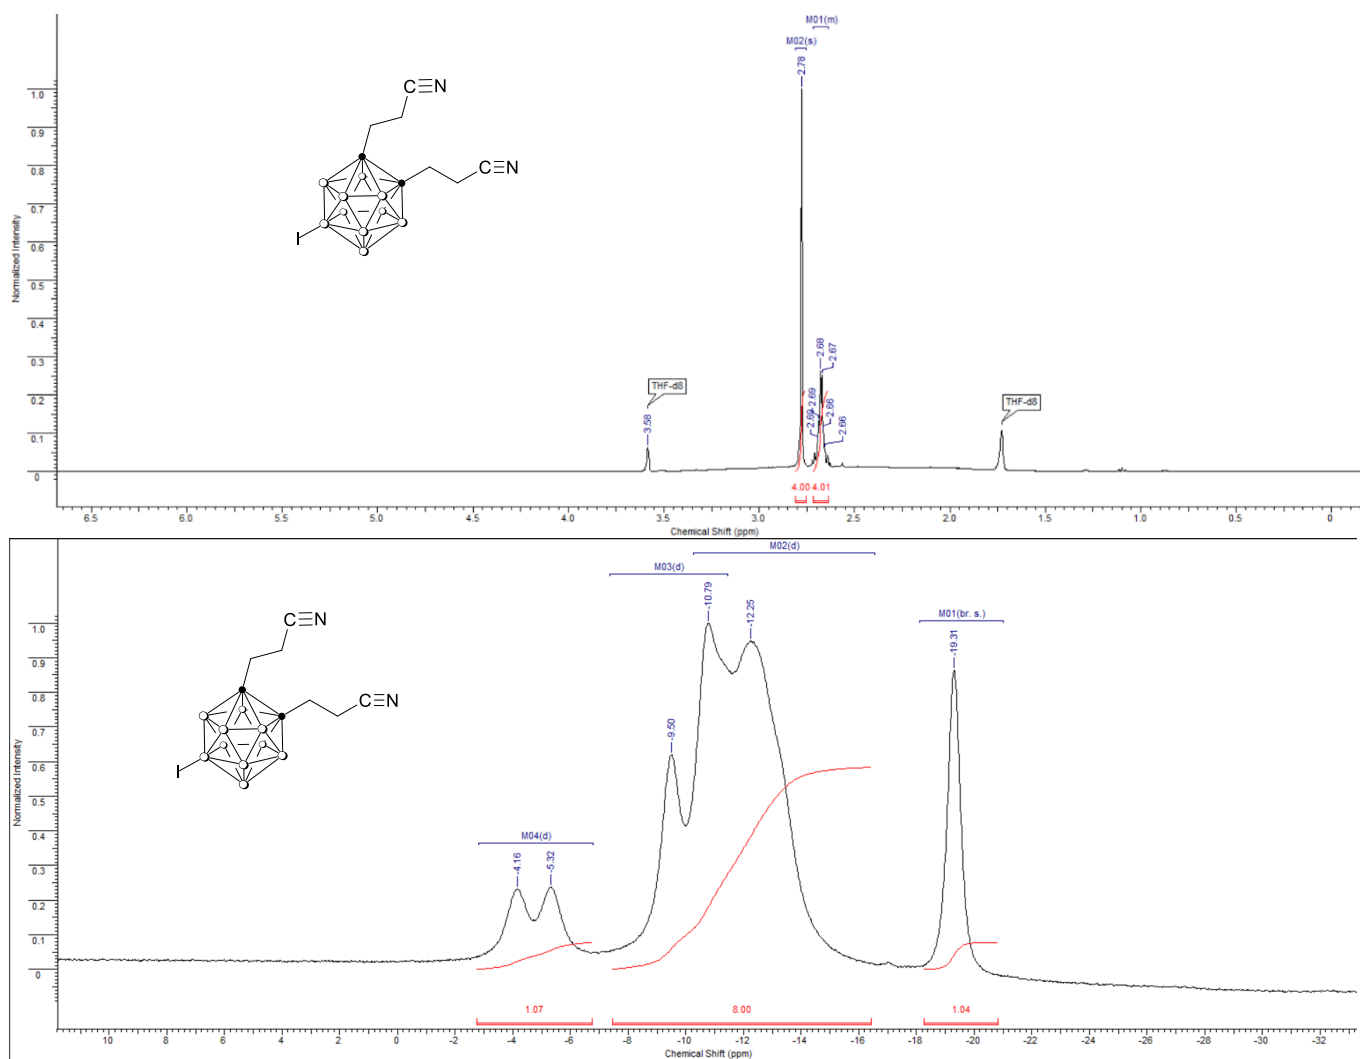

Figure S5. The  $^1\text{H}$  and  $^{11}\text{B}$  NMR spectra of 13 in THF- $d_8$ .

### 6. The $^1\text{H}$ , $^{11}\text{B}$ and $^{13}\text{C}$ NMR spectra of 1,2-bis(2-cyanoethyl)-9-*i*-propyl-*o*-carborane (14)

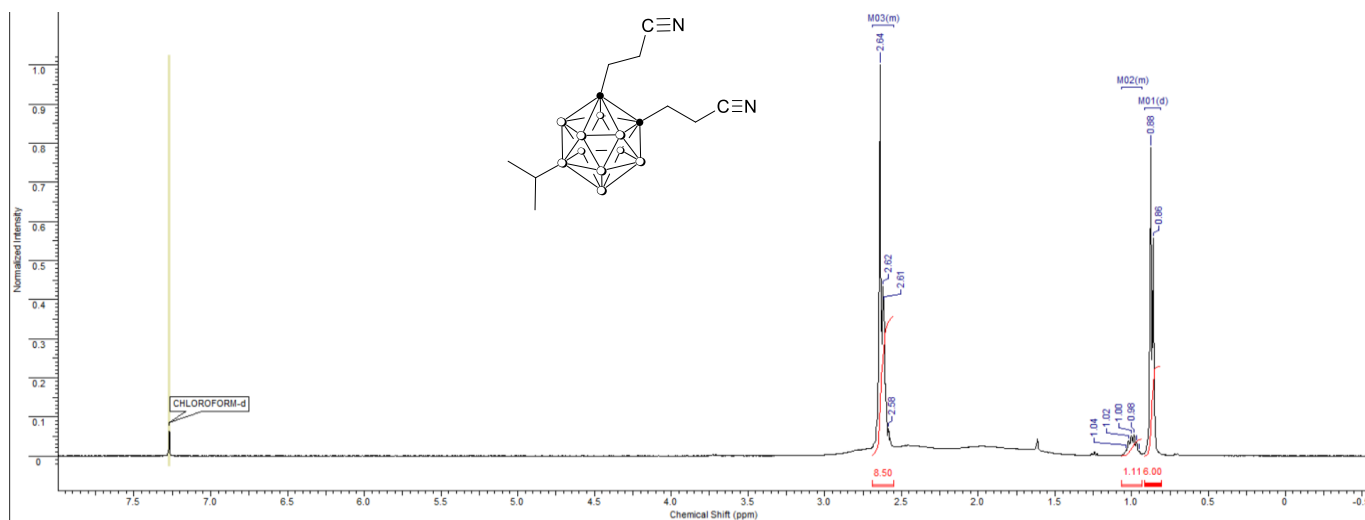

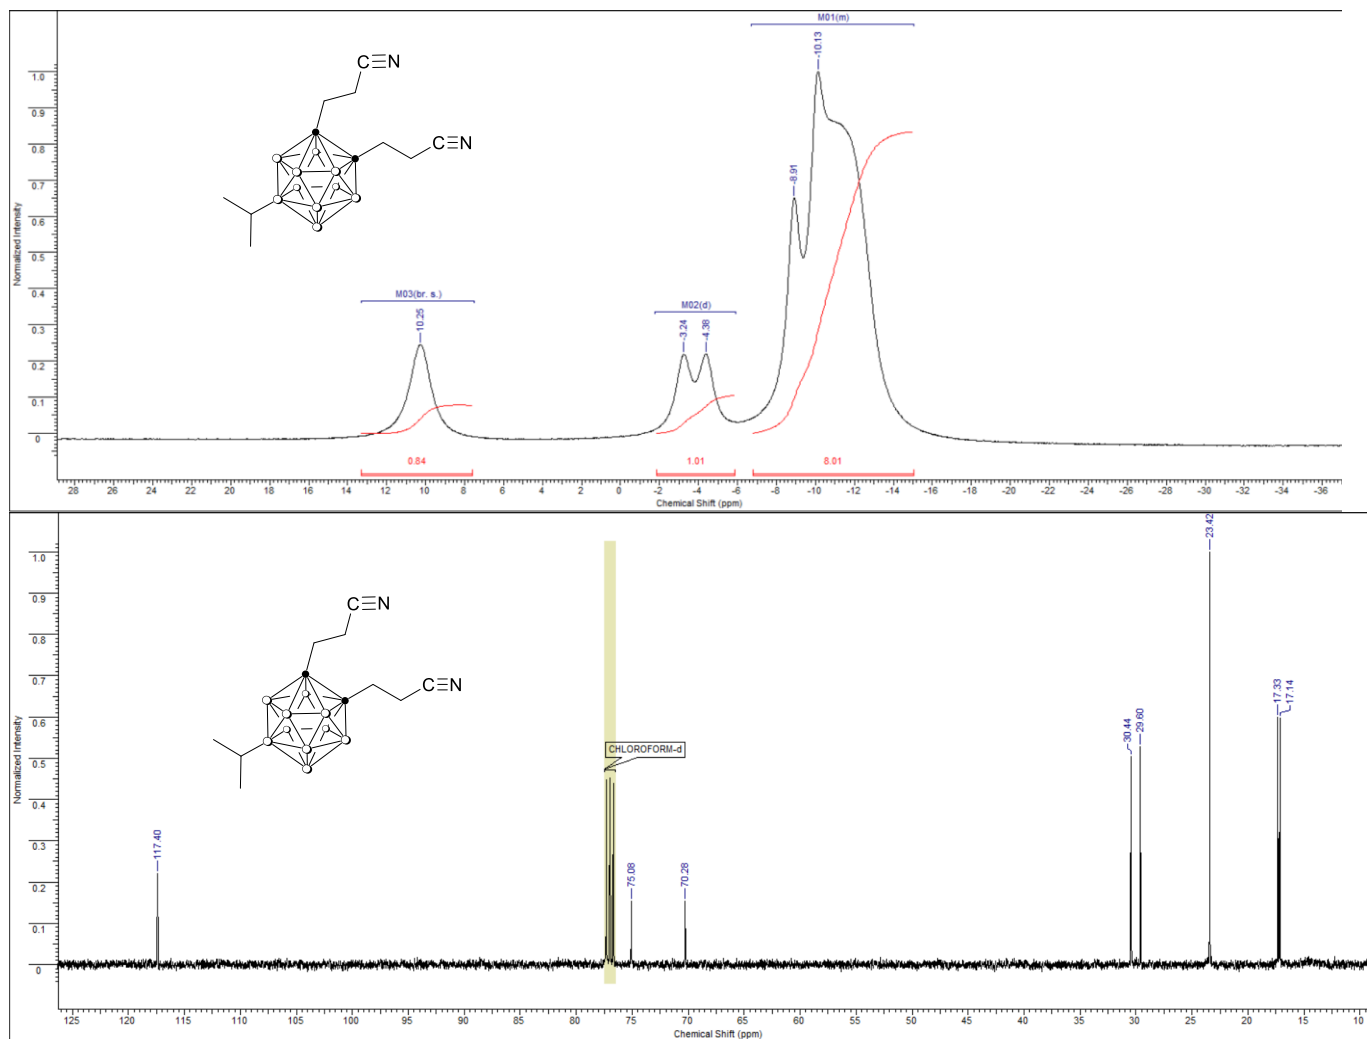

Figure S6. The  $^1\text{H}$ ,  $^{11}\text{B}$ ,  $^{13}\text{C}$  NMR spectra of **14** in  $\text{CDCl}_3$ .

## 7. The $^1\text{H}$ and $^{11}\text{B}$ NMR spectra of 1,2-bis(2-cyanoethyl)-9-allyl-*o*-carborane (**15**)

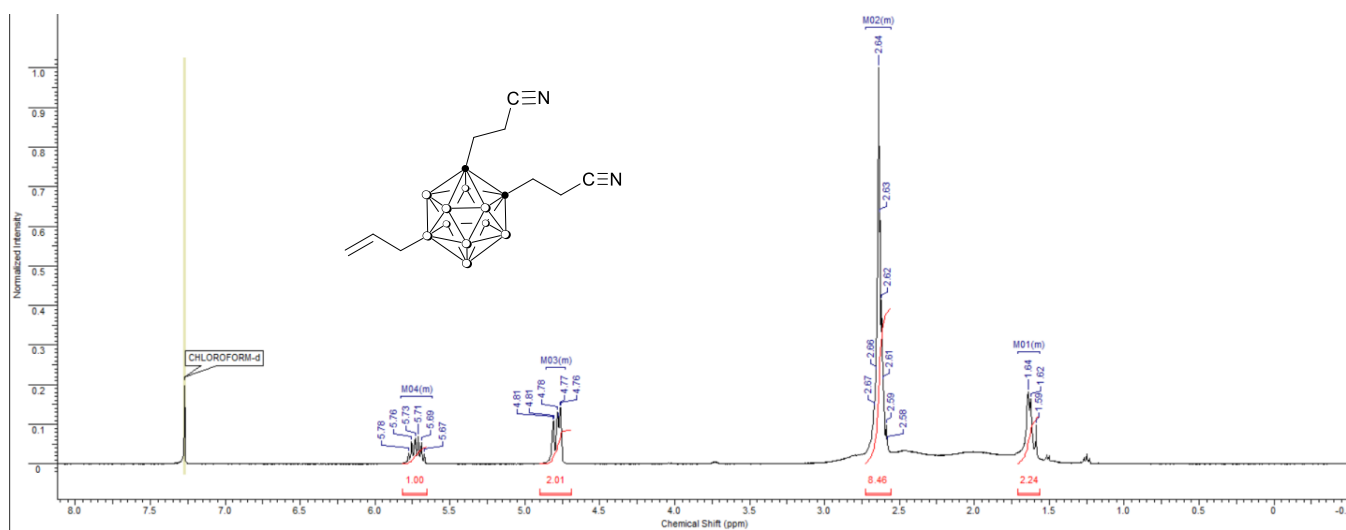

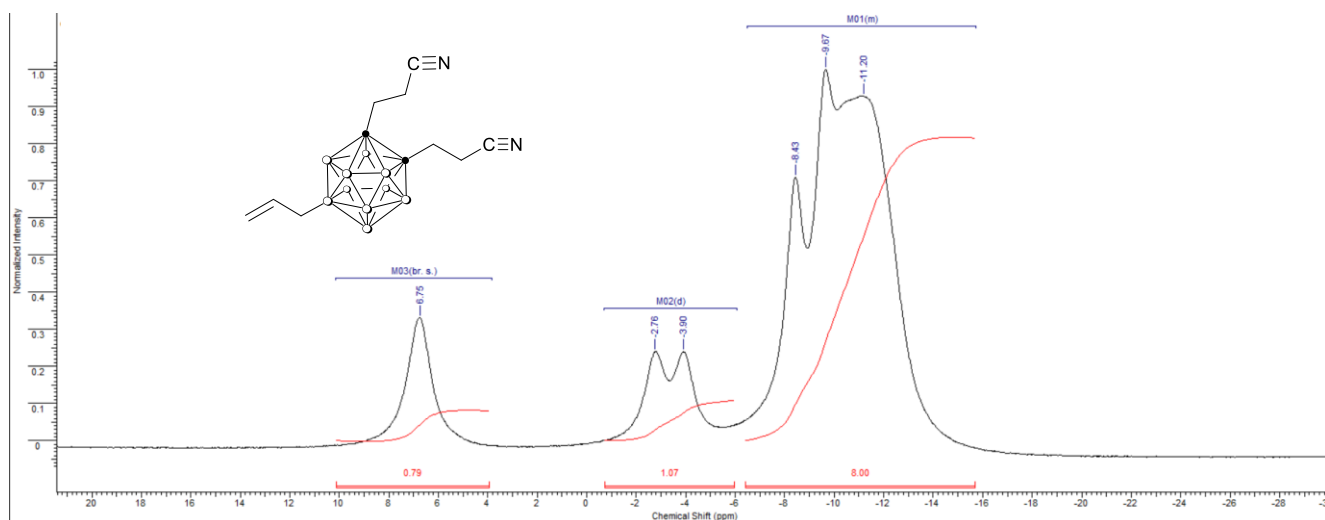

Figure S7. The  $^1\text{H}$  and  $^{11}\text{B}$  NMR spectra of **15** in  $\text{CDCl}_3$ .

### 8. The $^1\text{H}$ and $^{11}\text{B}$ NMR spectra of ethyl ester **16**

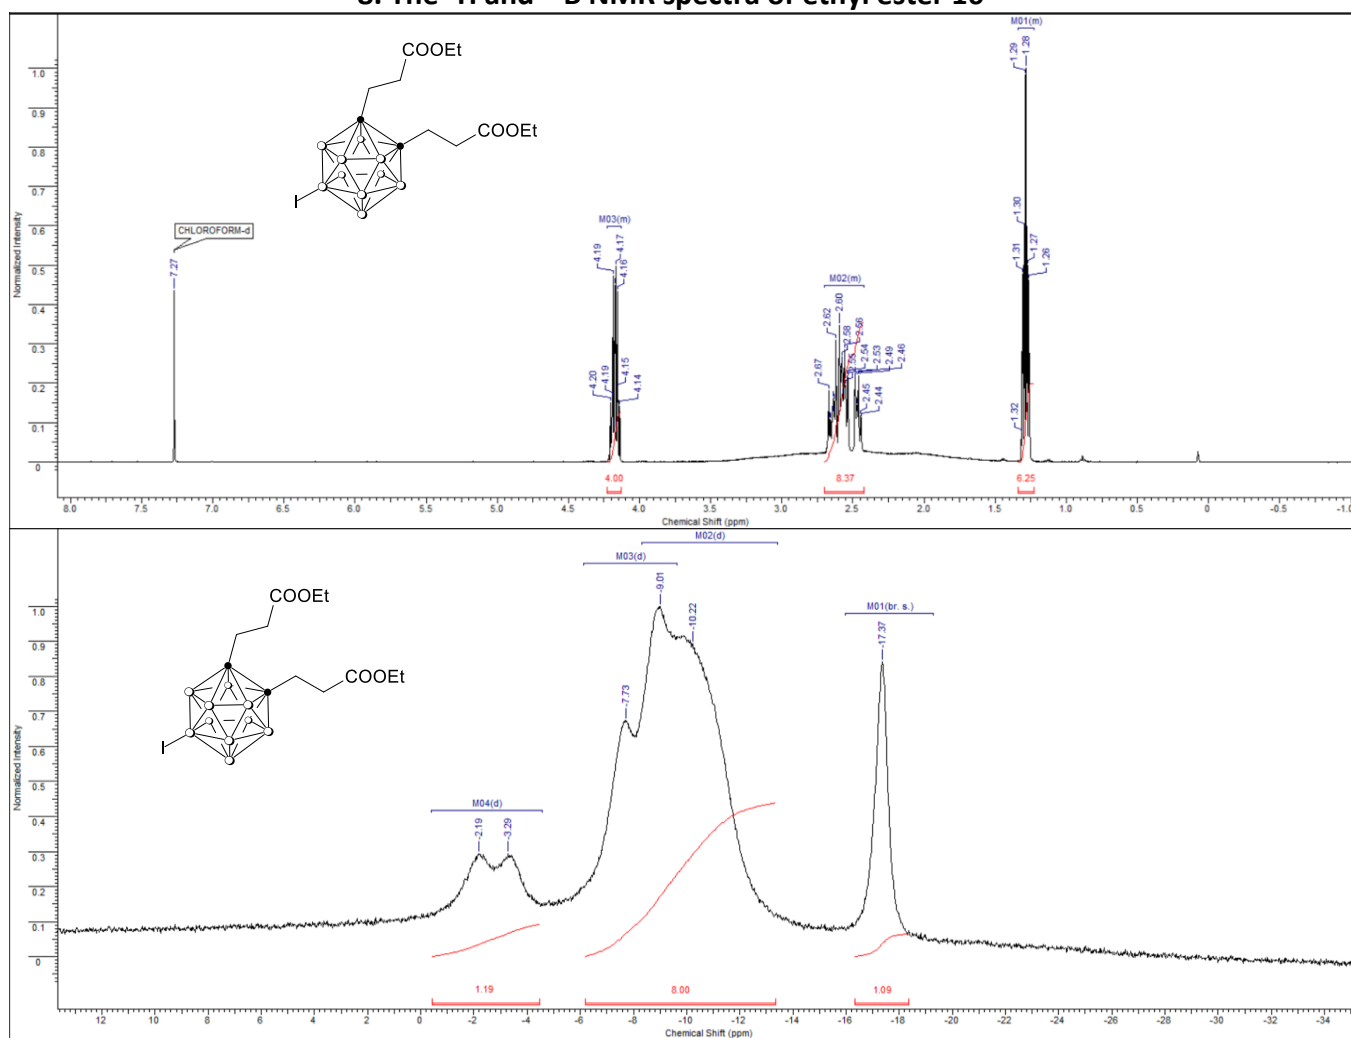

Figure S8. The  $^1\text{H}$  and  $^{11}\text{B}$  NMR spectra of **16** in  $\text{CDCl}_3$ .

### 9. The $^1\text{H}$ , $^{11}\text{B}$ and $^{13}\text{C}$ spectra of 3-amino-2-(2-cyanoethyl)-1-methyl-*o*-carborane (19)

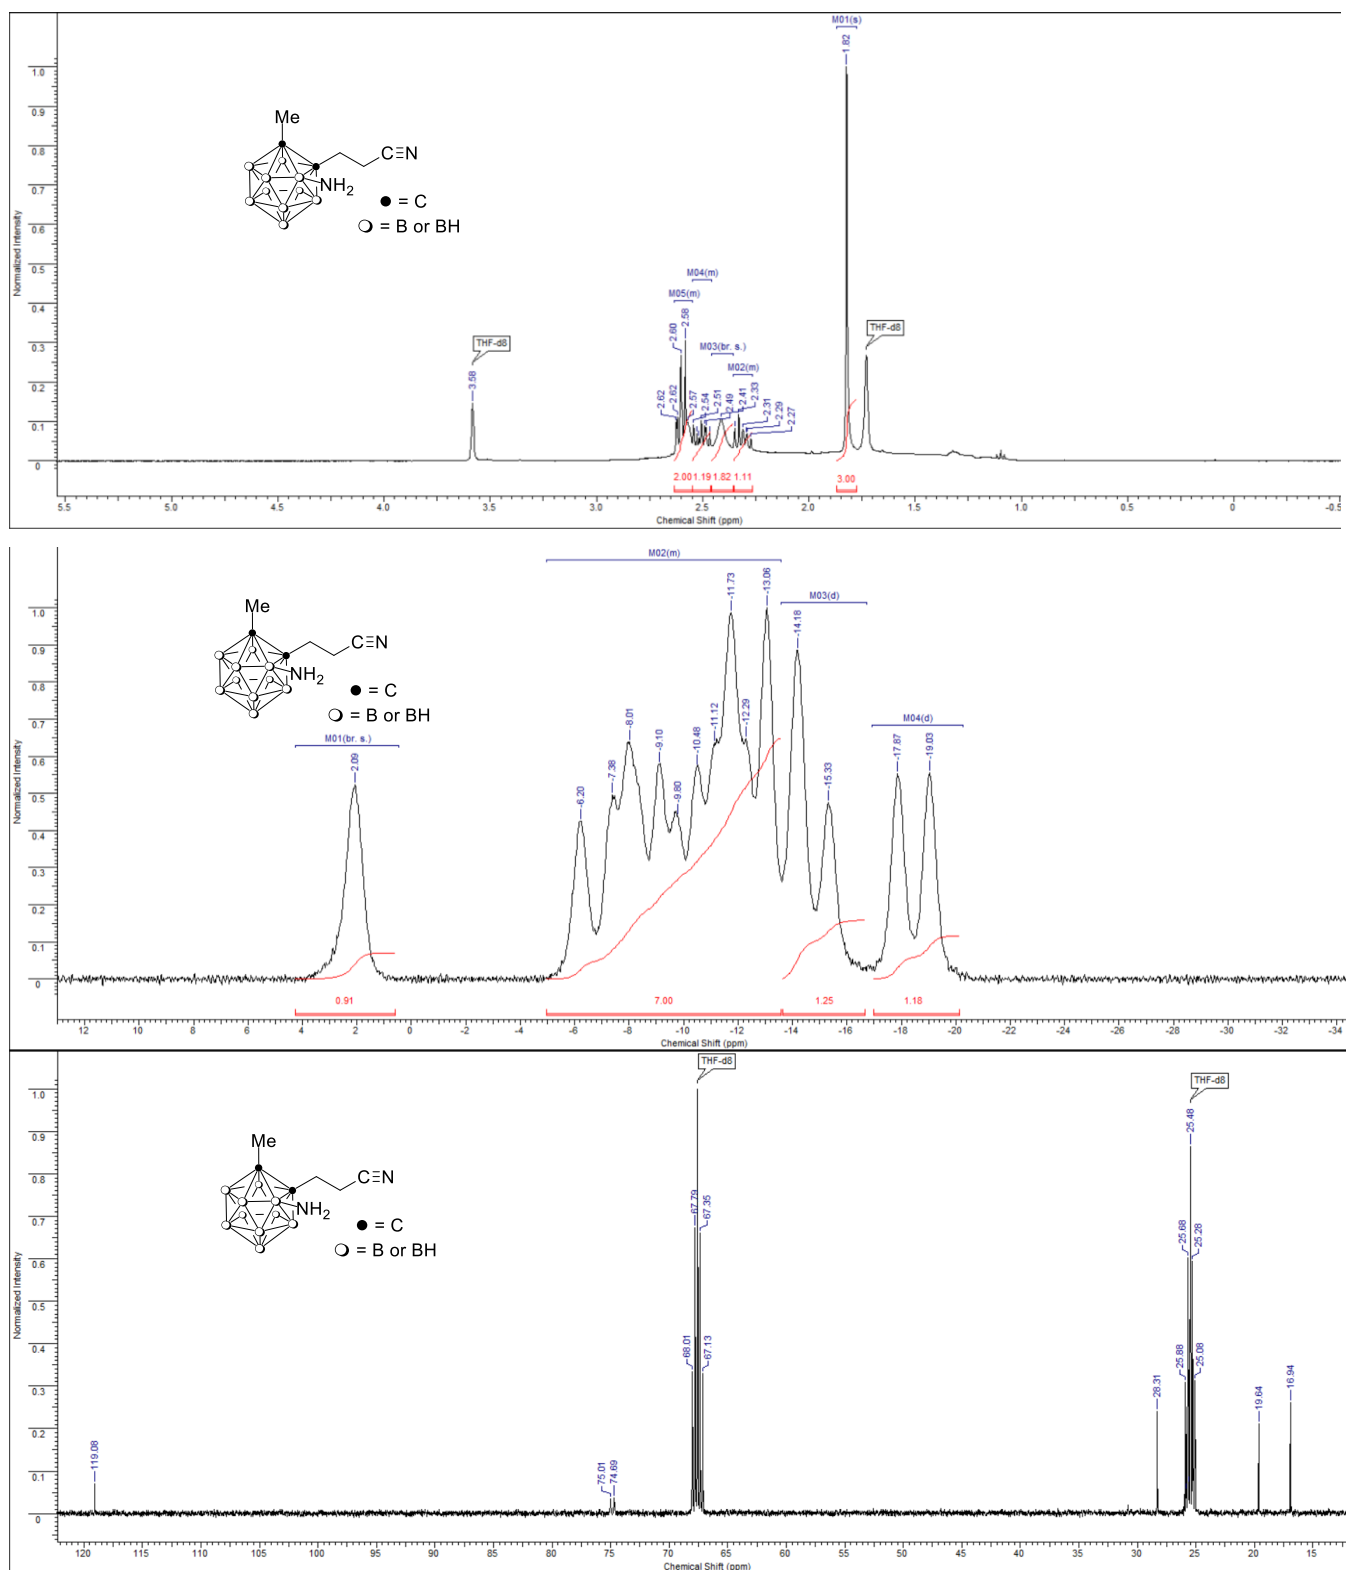

**Figure S9.** The  $^1\text{H}$ ,  $^{11}\text{B}$ ,  $^{13}\text{C}$  NMR spectra of **19** in THF- $\text{d}_8$ .



### 10. The $^1\text{H}$ , $^{11}\text{B}$ and $^{13}\text{C}$ NMR spectra of 3-amino-1,2-bis(2-cyanoethyl)-*o*-carborane (20)

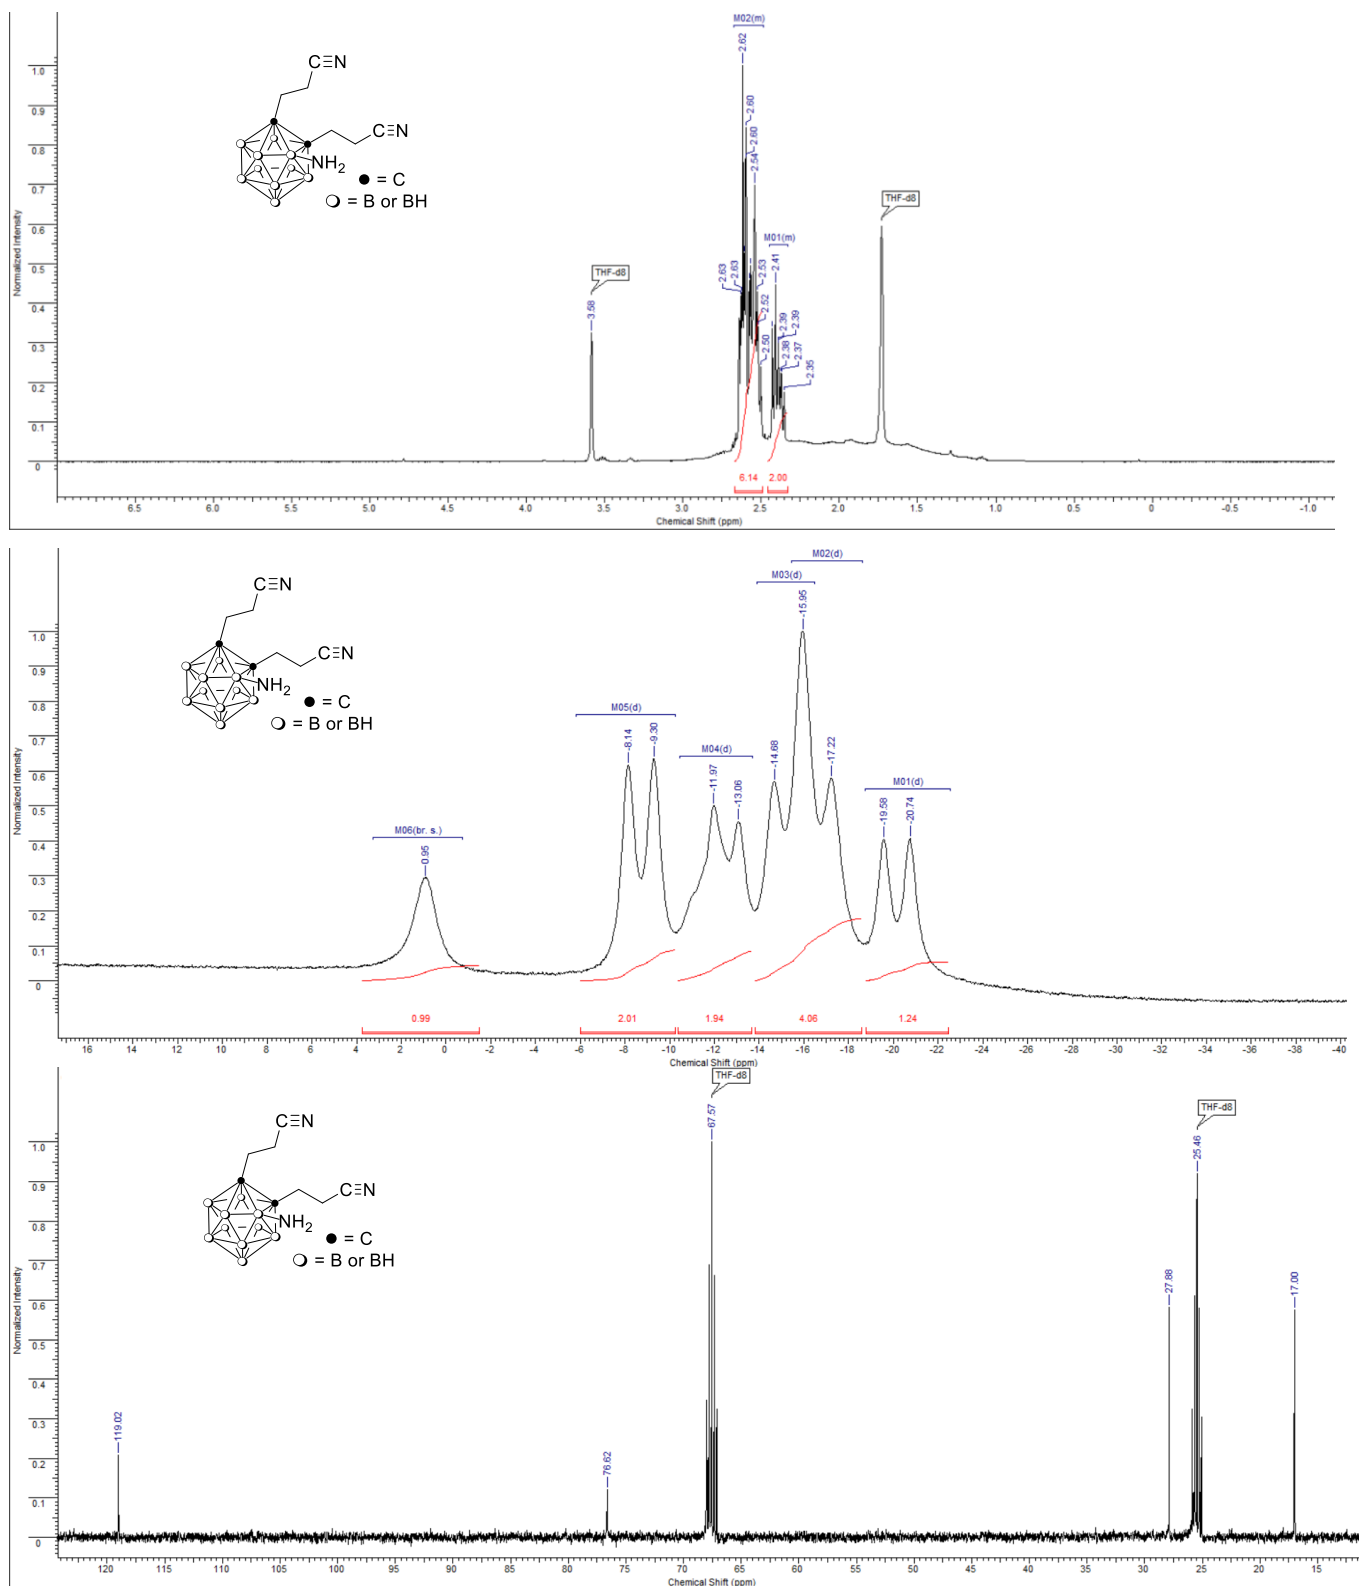

Figure S10. The  $^1\text{H}$ ,  $^{11}\text{B}$ ,  $^{13}\text{C}$  NMR spectra of 20 in THF-d<sub>8</sub>.

## 11. The $^1\text{H}$ and $^{11}\text{B}$ NMR spectra of compound **22**

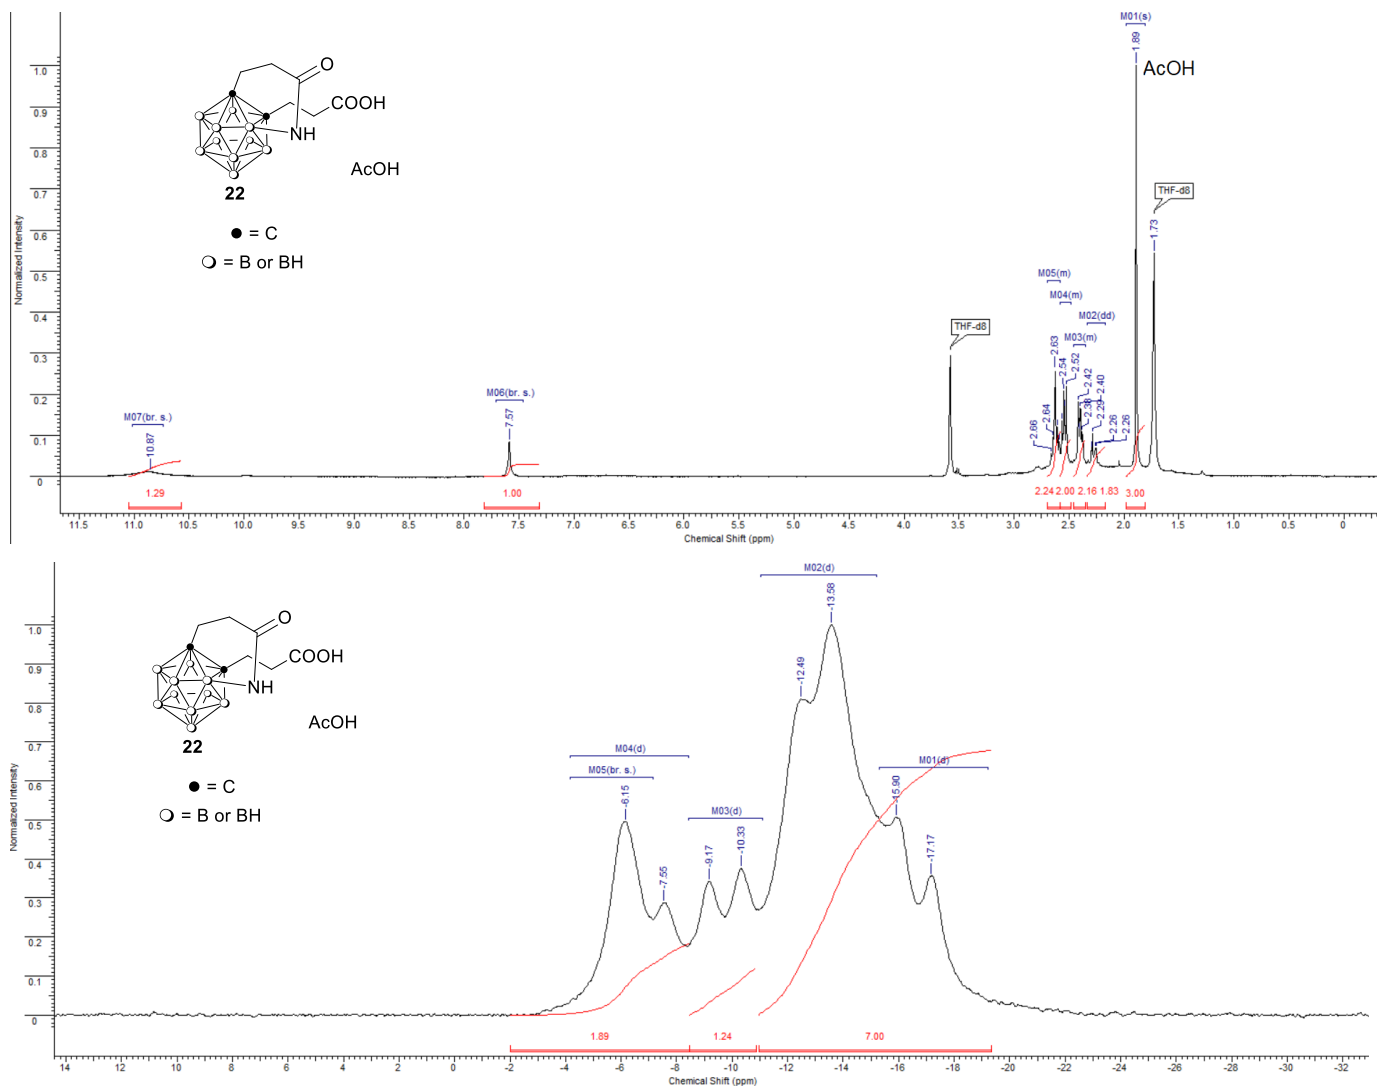

**Figure S11.** The  $^1\text{H}$ ,  $^{11}\text{B}$  NMR spectra of **22** in  $\text{THF-d}_8$ .

## 12. The $^1\text{H}$ and $^{11}\text{B}$ NMR spectra of 3-(1,4-diethoxy-1,4-dioxobut-2-en-2-yl)-amino-*o*-carborane (**25**)

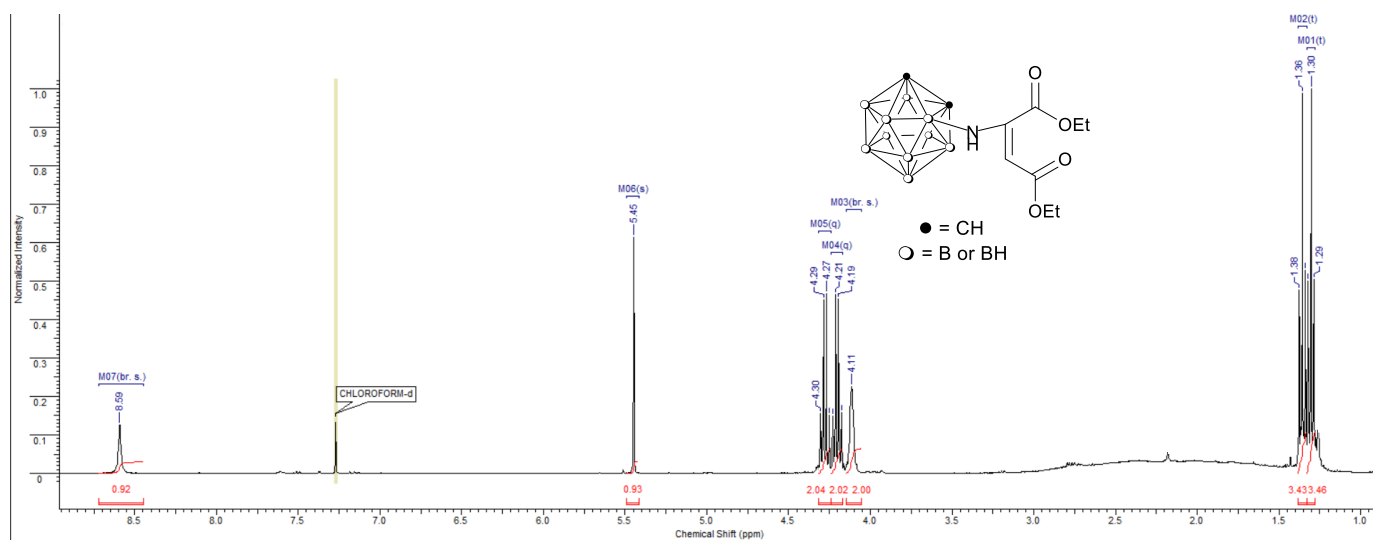

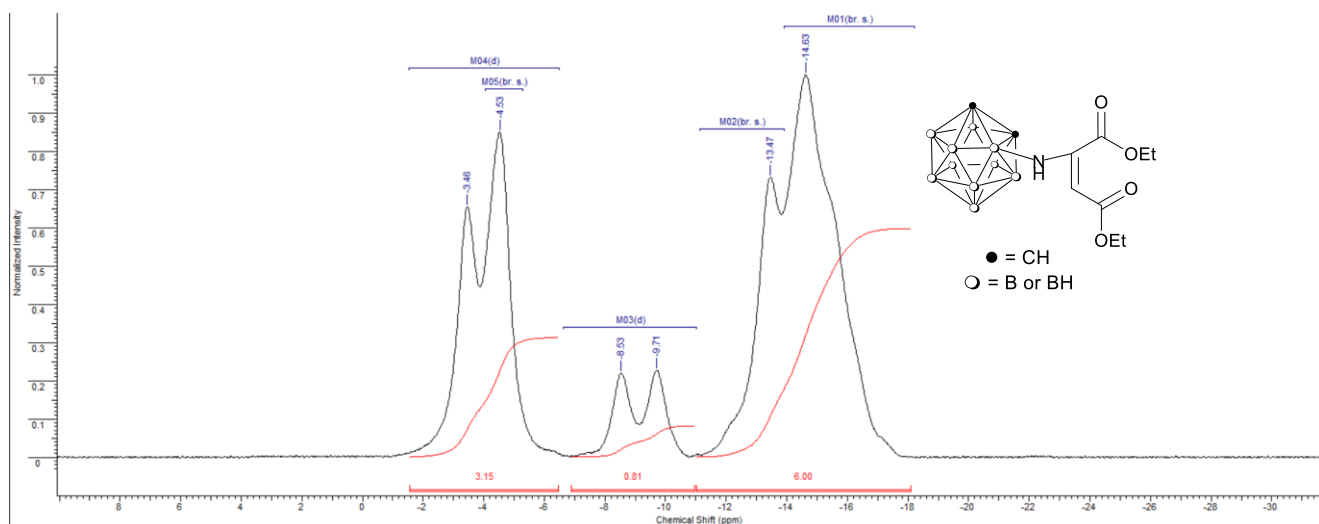

**Figure S12.** The  $^1\text{H}$  and  $^{11}\text{B}$  NMR spectra of **25** in  $\text{CDCl}_3$ .

**13. The  $^1\text{H}$  and  $^{11}\text{B}$  NMR spectra of 1,2-bis(2-cyanoethyl)-9-(2-cyanoethylthio)-*o*-carborane (**28**)**

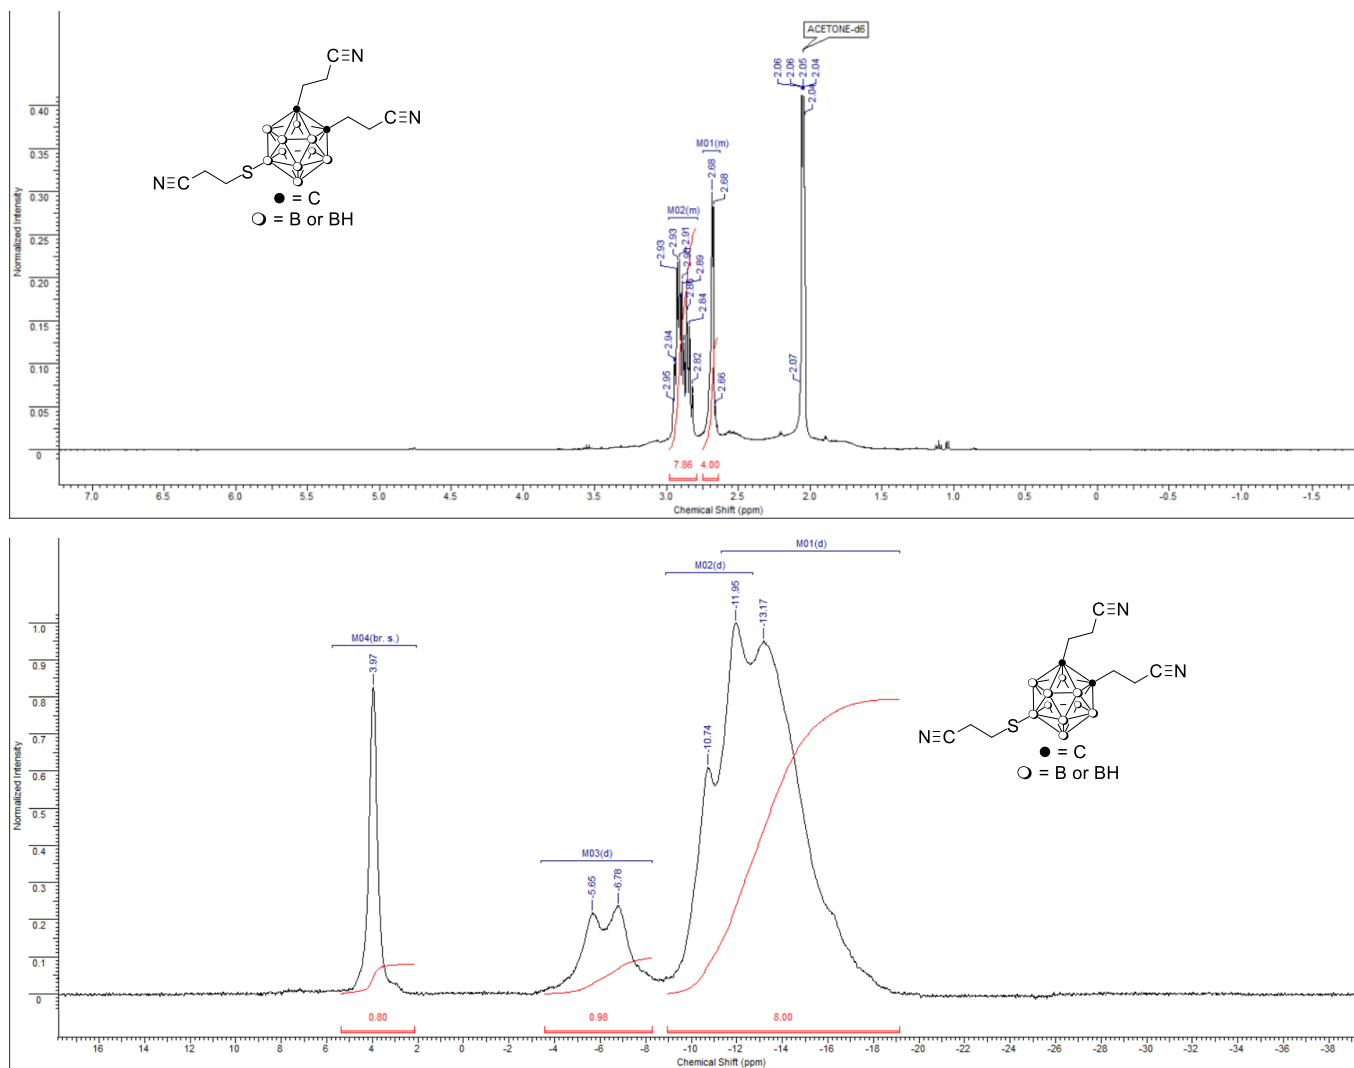

**Figure S13.** The  $^1\text{H}$  and  $^{11}\text{B}$  NMR spectra of **28** in  $(\text{CD}_3)_2\text{CO}$ .

### 14. The $^1\text{H}$ , $^{11}\text{B}$ and $^{13}\text{C}$ NMR spectra of 9-(2-cyanoethylthio)-*o*-carborane (29)

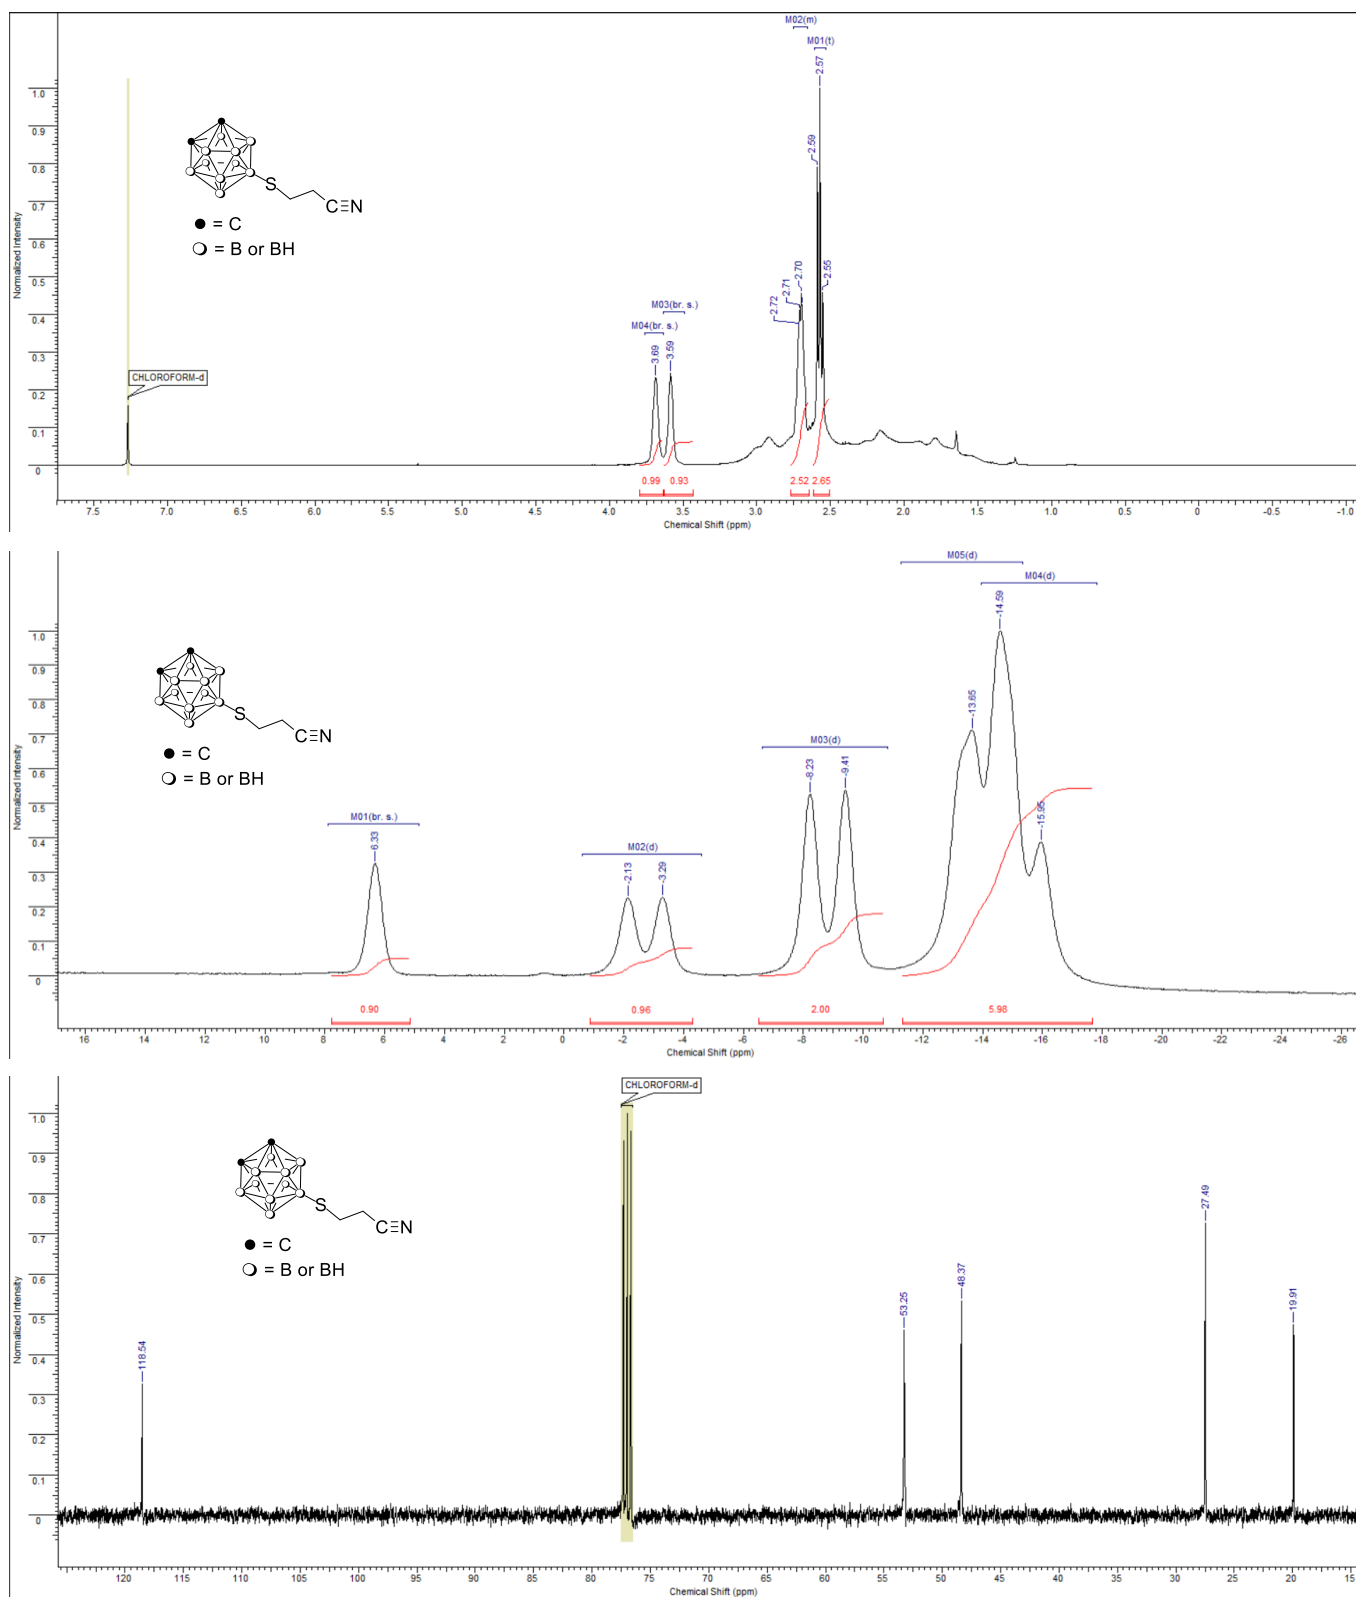

**Figure S14.** The  $^1\text{H}$ ,  $^{11}\text{B}$ ,  $^{13}\text{C}$  NMR spectra of **29** in  $\text{CDCl}_3$ .

### 15. The $^1\text{H}$ and $^{11}\text{B}$ NMR spectra of acid 30

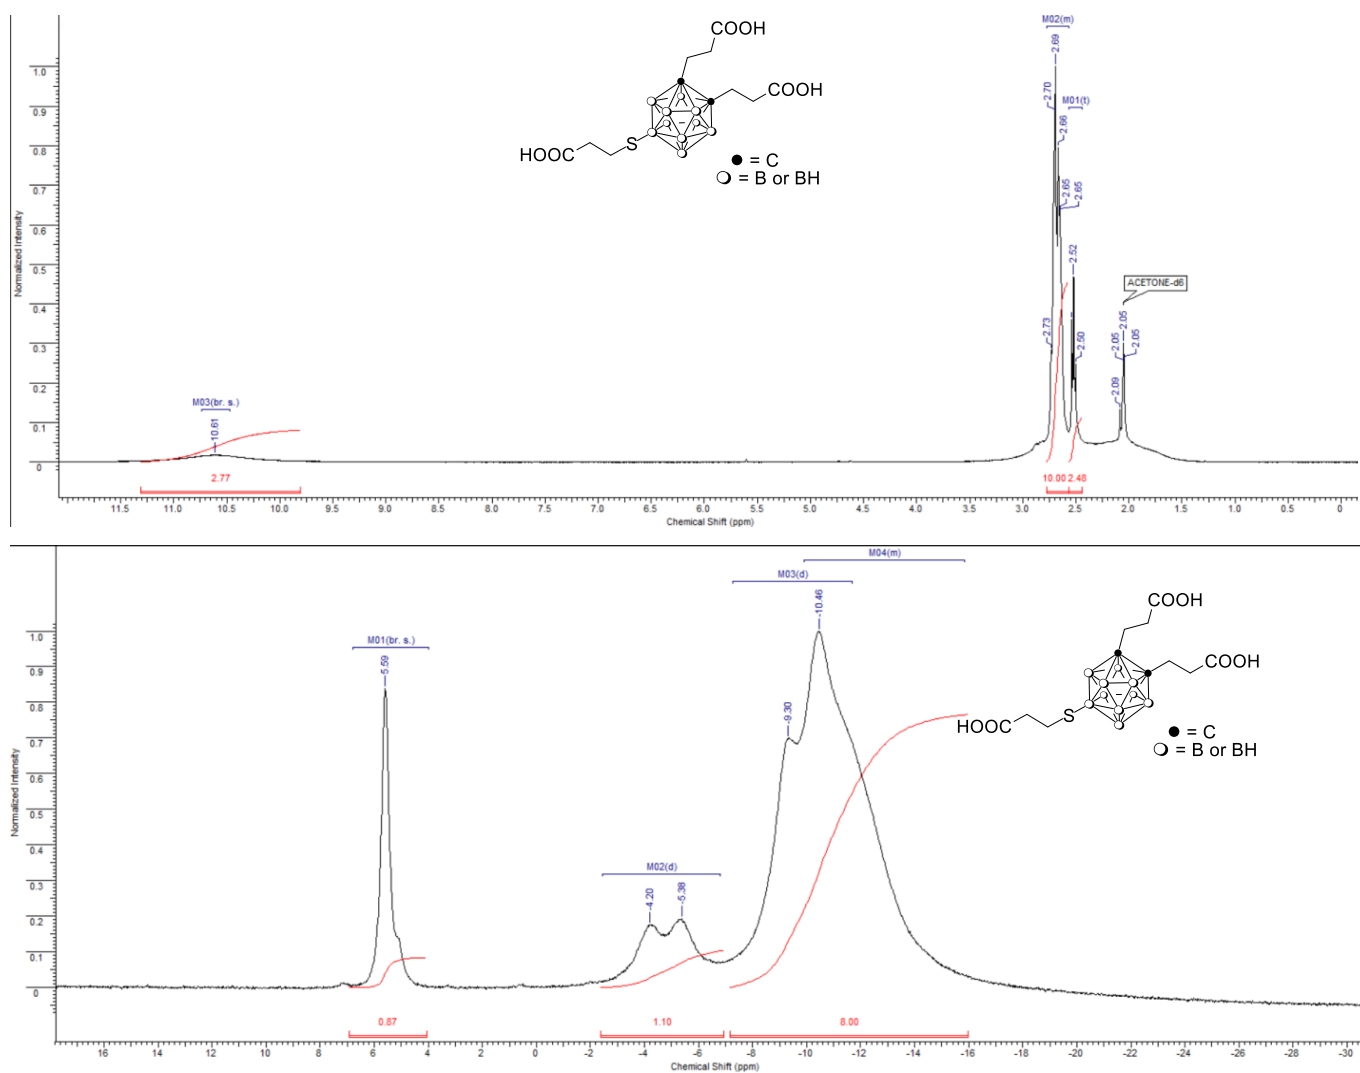

Figure S15. The  $^1\text{H}$  and  $^{11}\text{B}$  NMR spectra of 30 in  $(\text{CD}_3)_2\text{CO}$ .

### 16. The $^1\text{H}$ and $^{11}\text{B}$ NMR spectra of 9-(2-cyanoethylthio)-*m*-carborane (31)

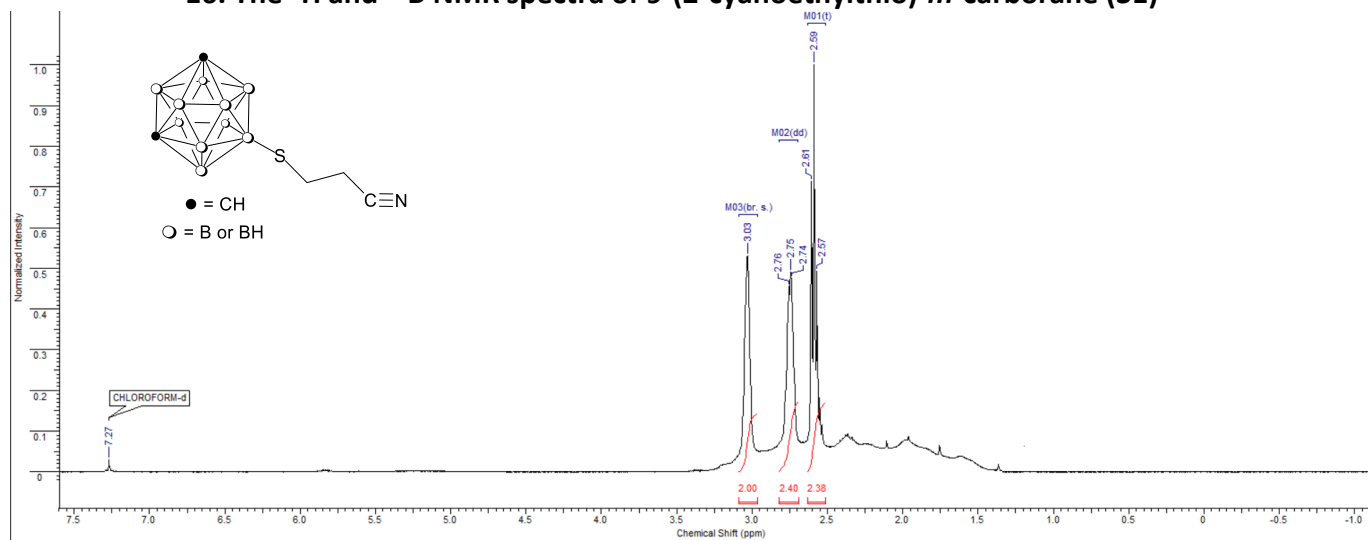

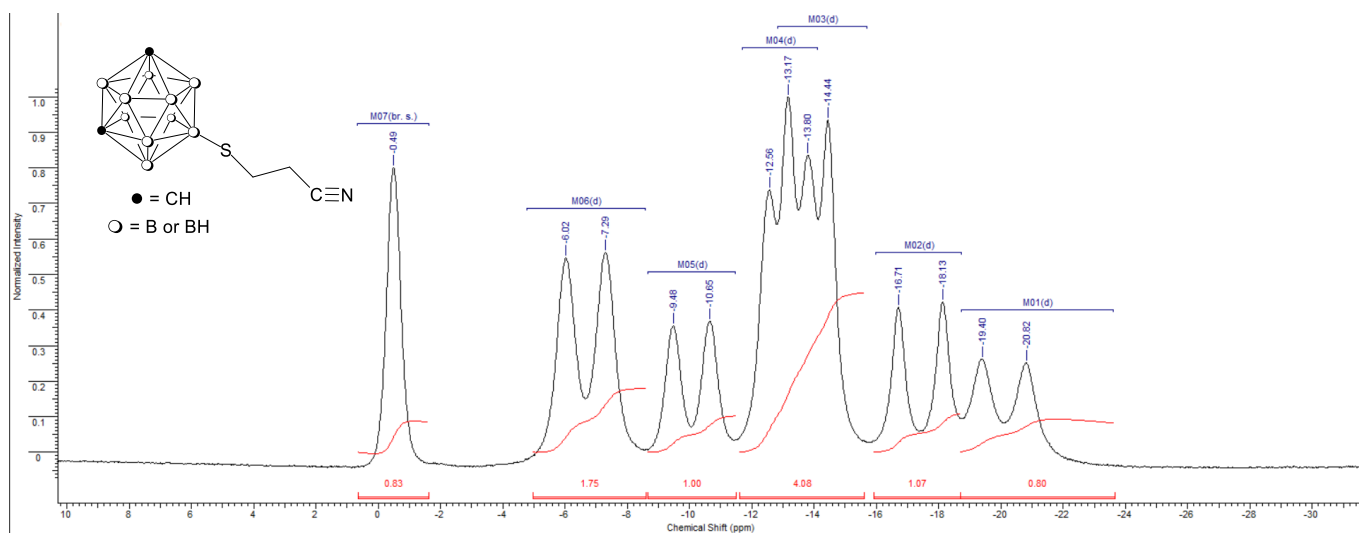

**Figure S16.** The <sup>1</sup>H and <sup>11</sup>B NMR spectra of **31** in CDCl<sub>3</sub>.

**17. The <sup>1</sup>H and <sup>11</sup>B NMR spectra of 3-[(*o*-carboran-9-yl)thio]methylpropanoate (**32**)**

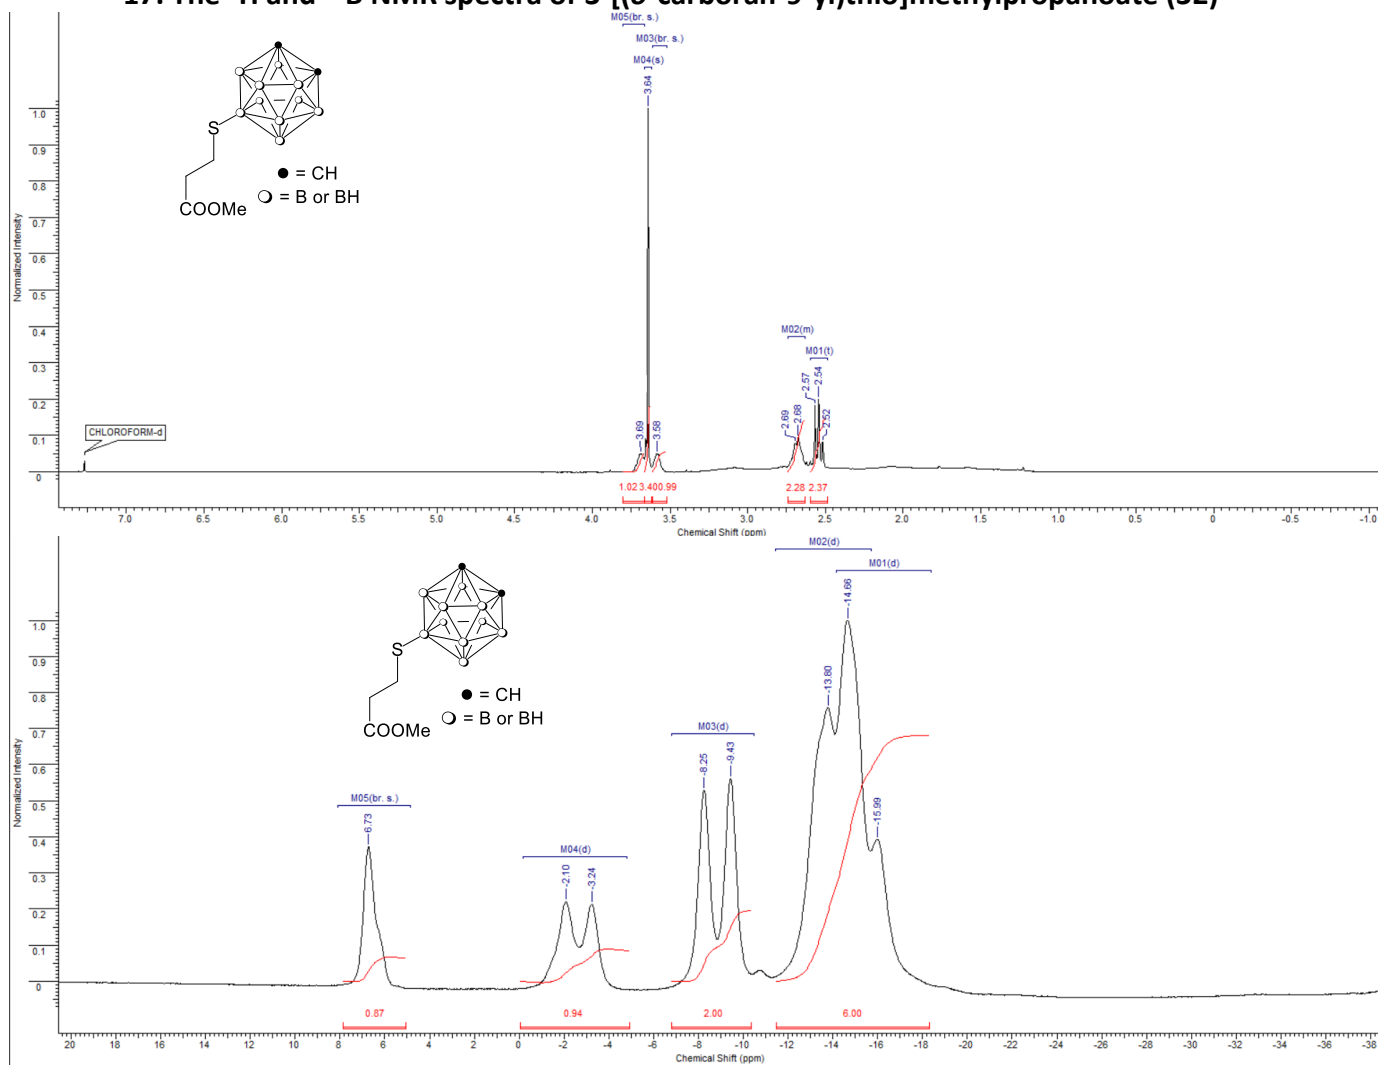

**Figure S17.** The <sup>1</sup>H and <sup>11</sup>B NMR spectra of **32** in CDCl<sub>3</sub>.

18. The  $^1\text{H}$ ,  $^{11}\text{B}$  and  $^{13}\text{C}$  NMR spectra of 3-[(*m*-carboran-9-yl)thio]methylpropanoate (**33**)

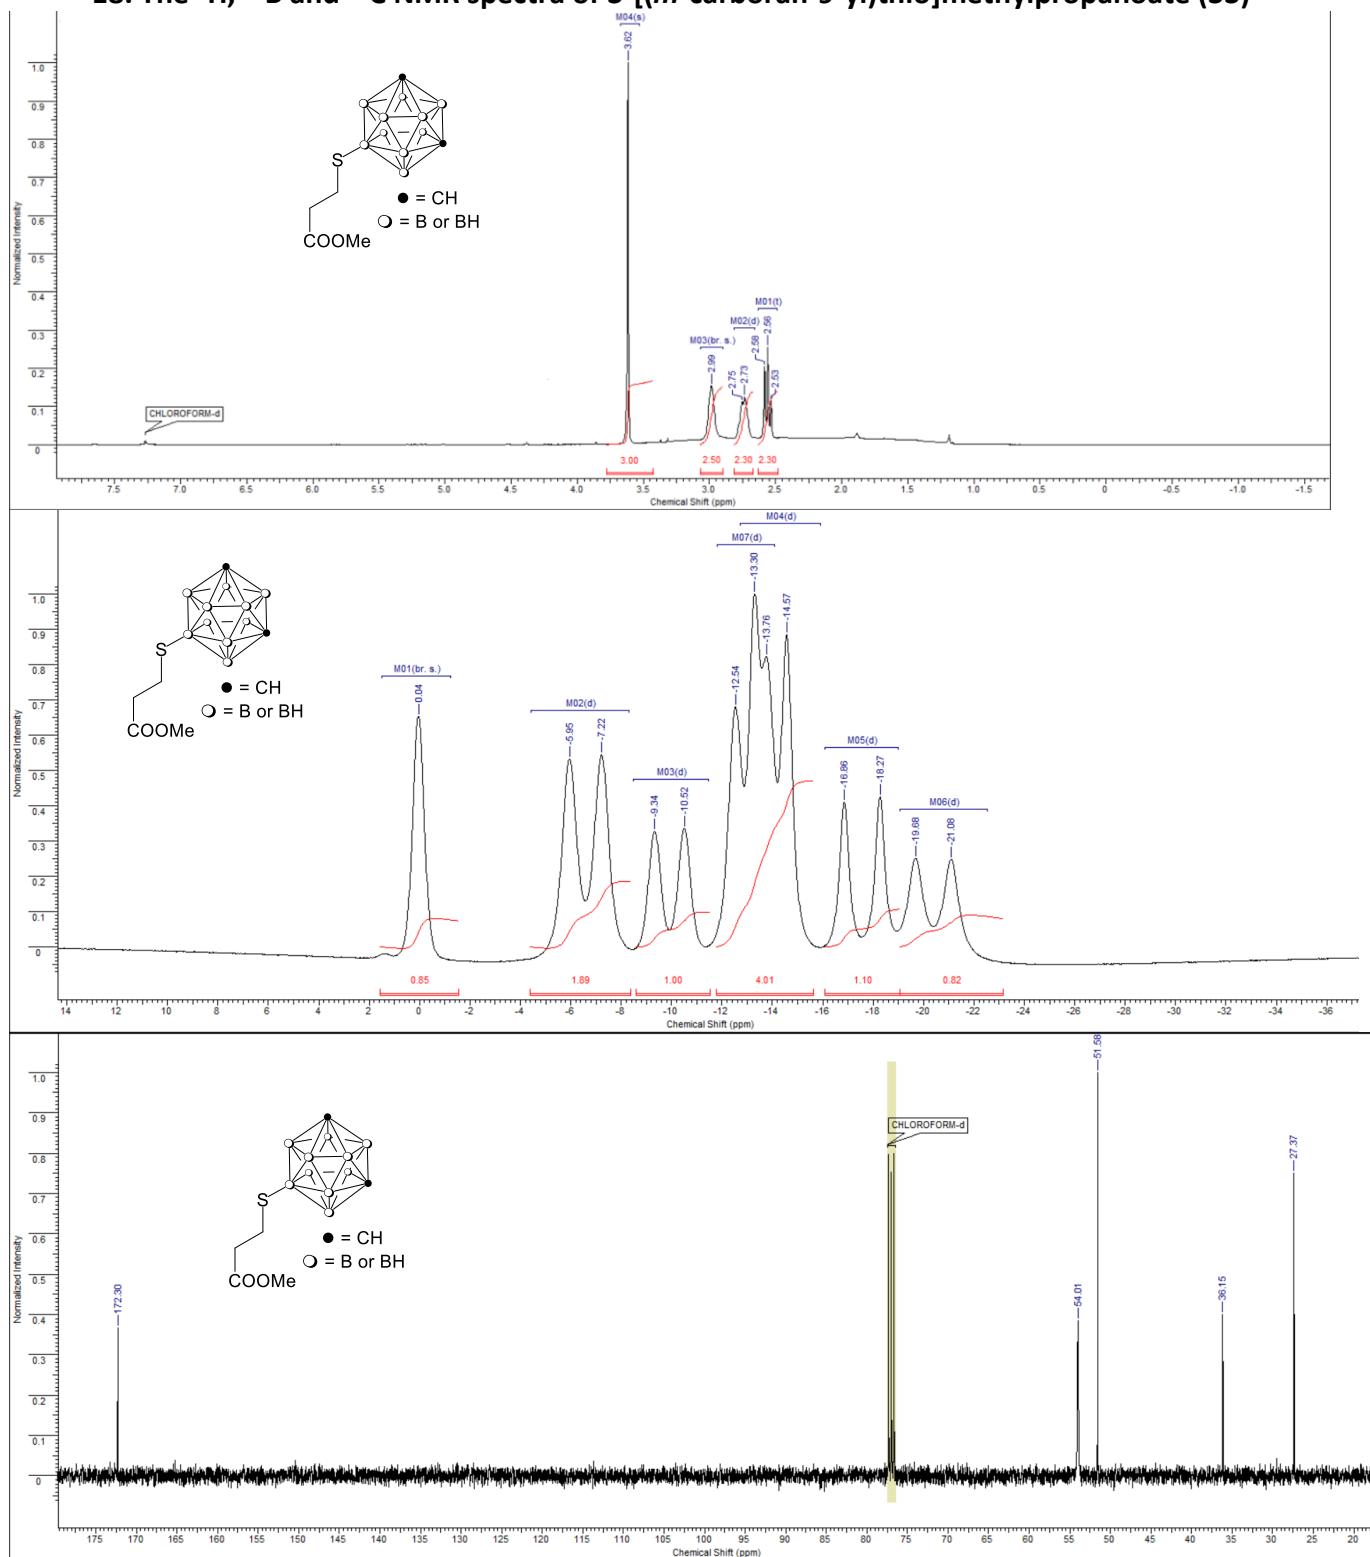

Figure S18. The  $^1\text{H}$ ,  $^{11}\text{B}$ ,  $^{13}\text{C}$  NMR spectra of **33** in  $\text{CDCl}_3$ .
